# Supplementary material for: Platinum redispersion on metal oxides in low temperature fuel cells
Source: Royal Society of Chemistry journal article supplement (doi:10.1039/c2cp43248j), 2013-01-01
Supplement: c2cp43248j.pdf [file c2cp43248j.pdf]

### S1: Lattice parameters and illustrations of the bulk crystal structures:

| Form.                                                  | Structure                      | a(calc/exp)           | b(calc/exp) | c(calc/exp) | angle(calc/exp) |
|--------------------------------------------------------|--------------------------------|-----------------------|-------------|-------------|-----------------|
| <b>TiO<sub>2</sub></b>                                 | Rutile<br>(tetragonal)         | 4.682                 | -           | 2.974       | -               |
|                                                        |                                | 4.594 <sup>e[1]</sup> |             | 2.959       |                 |
| <b>SiO<sub>2</sub></b>                                 | $\alpha$ quartz<br>(hexagonal) | 4.991                 | -           | 5.500       | -               |
|                                                        |                                | 4.916 <sup>t[2]</sup> |             | 5.405       |                 |
| <b>SnO<sub>2</sub></b>                                 | Rutile<br>(tetragonal)         | 4.864                 | -           | 3.249       | -               |
|                                                        |                                | 4.737 <sup>e[1]</sup> |             | 3.186       |                 |
| <b>NbO<sub>2</sub></b>                                 | Rutile<br>(tetragonal)         | 4.980                 | -           | 2.943       | -               |
|                                                        |                                | 4.85 <sup>e[3]</sup>  |             | 3.03        |                 |
| <b><math>\gamma</math>-Al<sub>2</sub>O<sub>3</sub></b> | Monoclinic                     | 5.637                 | 8.613       | 8.068       | 90.012          |
|                                                        |                                | 5.587 <sup>t[4]</sup> | 8.413       | 8.068       | 90.590          |
| <b><math>\delta</math>-Ta<sub>2</sub>O<sub>5</sub></b> | Hexagonal                      | 7.366                 | -           | 3.907       | -               |
|                                                        |                                | 7.248 <sup>e[5]</sup> |             | 3.880       |                 |
| <b><math>\alpha</math>-Nb<sub>2</sub>O<sub>5</sub></b> | Monoclinic                     | 21.56                 | 3.847       | 19.58       | 119.61          |
|                                                        |                                | 21.16 <sup>e[6]</sup> | 3.822       | 19.35       | 119.50          |
| <b>ZrO<sub>2</sub></b>                                 | Monoclinic                     | 5.211                 | 5.278       | 5.387       | 99.38           |
|                                                        |                                | 5.150 <sup>e[7]</sup> | 5.212       | 5.315       | 99.23           |

Table 1: The calculated and experimental (e) lattice parameters. Where no experimental information was available, other theoretical (t) values have been used for comparison.

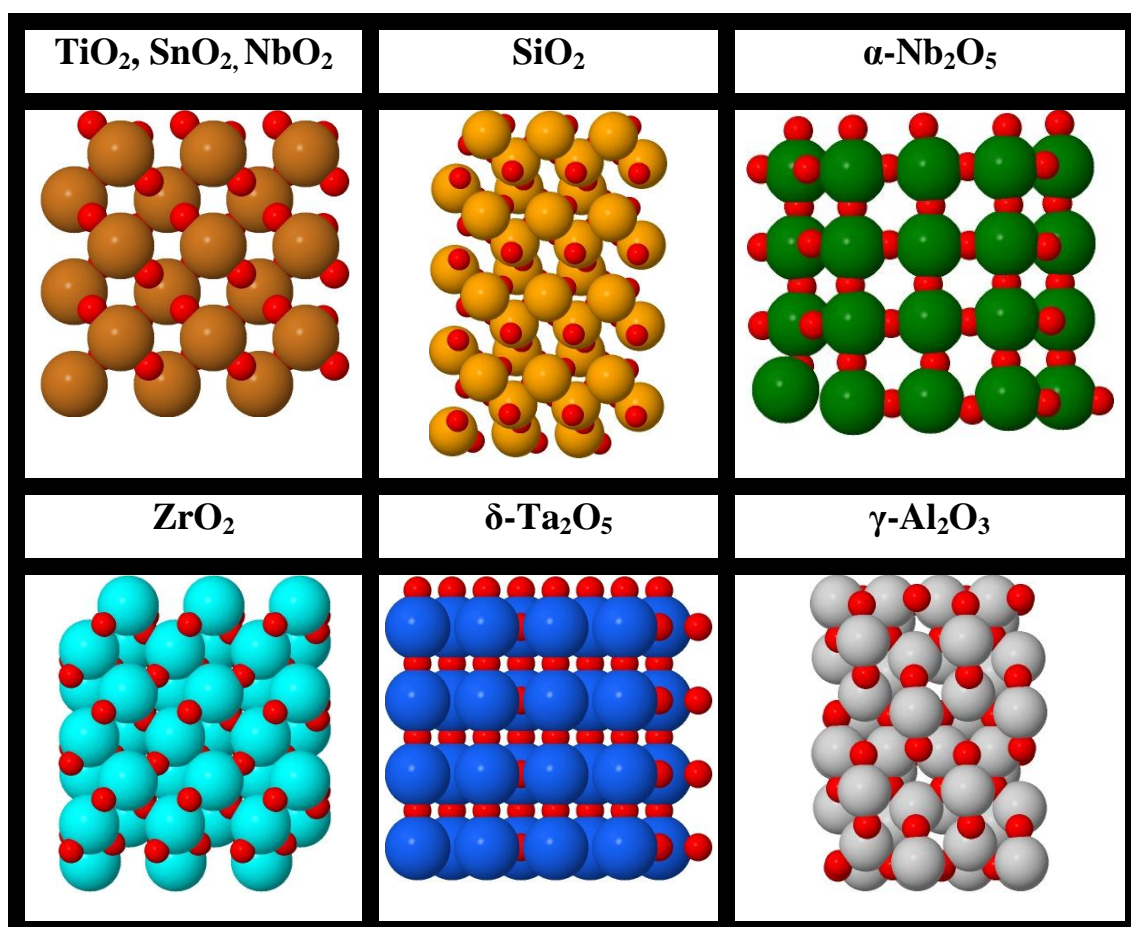

Figure 1: Illustrations of the most stable bulk crystal structures of the metal oxides.

## S2: Stability plots

Stability diagrams for the most close-packed surface terminations, different rutile steps and for the  $\text{PtO}_x$  adsorption on the steps and in the first surface layer are shown in the figures below. The figures were made by adding (or subtracting) oxygen atoms to (or from) the metal oxide surfaces with the stoichiometric ratio of metal and oxygen atoms.

The adsorption values at  $U = 0$  V were calculated with use of Eq. (1).

$$\Delta G_{U=0}(x\text{O}^*) = G(\text{MO} + x\text{O}^*) - G(\text{MO}) - xG(\text{H}_2\text{O}) + xG(\text{H}_2), \quad (1)$$

in which  $x$  represents the number of adsorbed oxygen atoms. The free energy dependence on potential is obtained by relating the free energy of protons and electrons to the free energy of hydrogen in the gas phase according to the Standard Hydrogen Electrode (SHE) concept. [8] Following this concept the free energy value of  $\Delta G_U(x\text{O}^*)$  at any potential is given by Eq. (2).

$$\Delta G_U(x\text{O}^*) = \Delta G_{U=0}(x\text{O}^*) - 2xU \quad (2)$$

Similar equation was used to calculate the free energies of oxygen vacancies at varying  $U$ .

$$\Delta G_U(x\text{O}_{\text{vac}}) = \Delta G_{U=0}(x\text{O}_{\text{vac}}) + 2xU \quad (3)$$

### Stability plots for the most stable metal oxide surface terminations

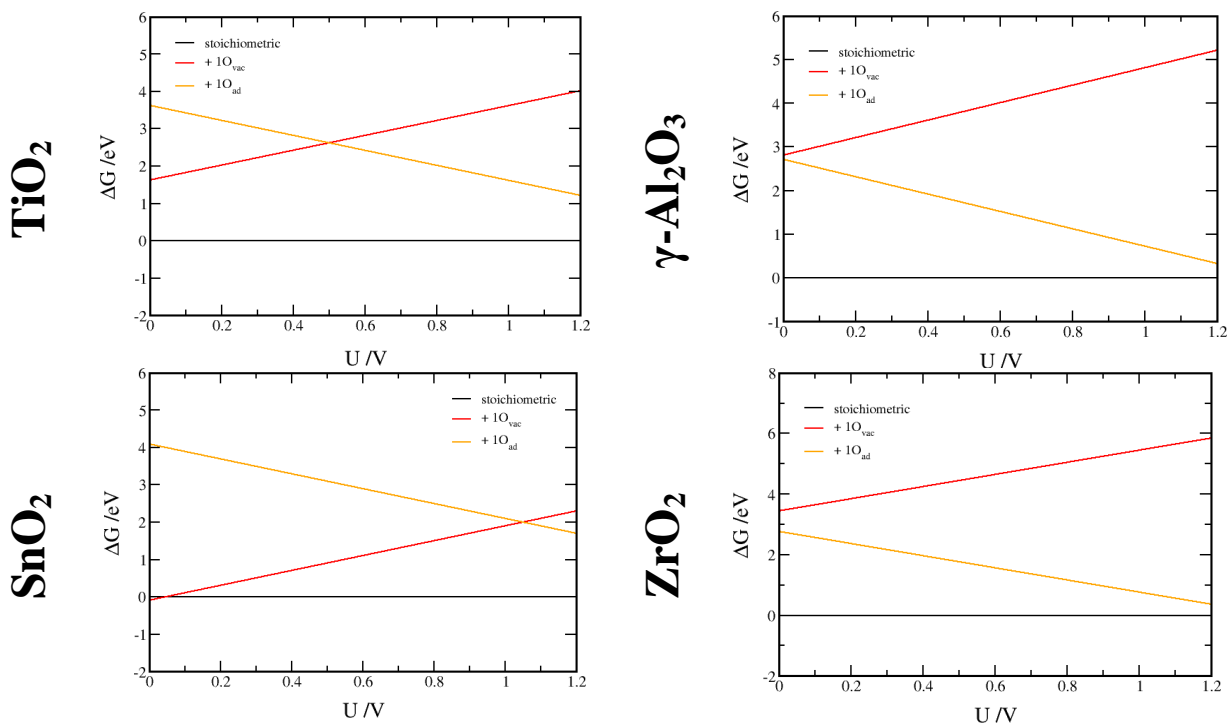

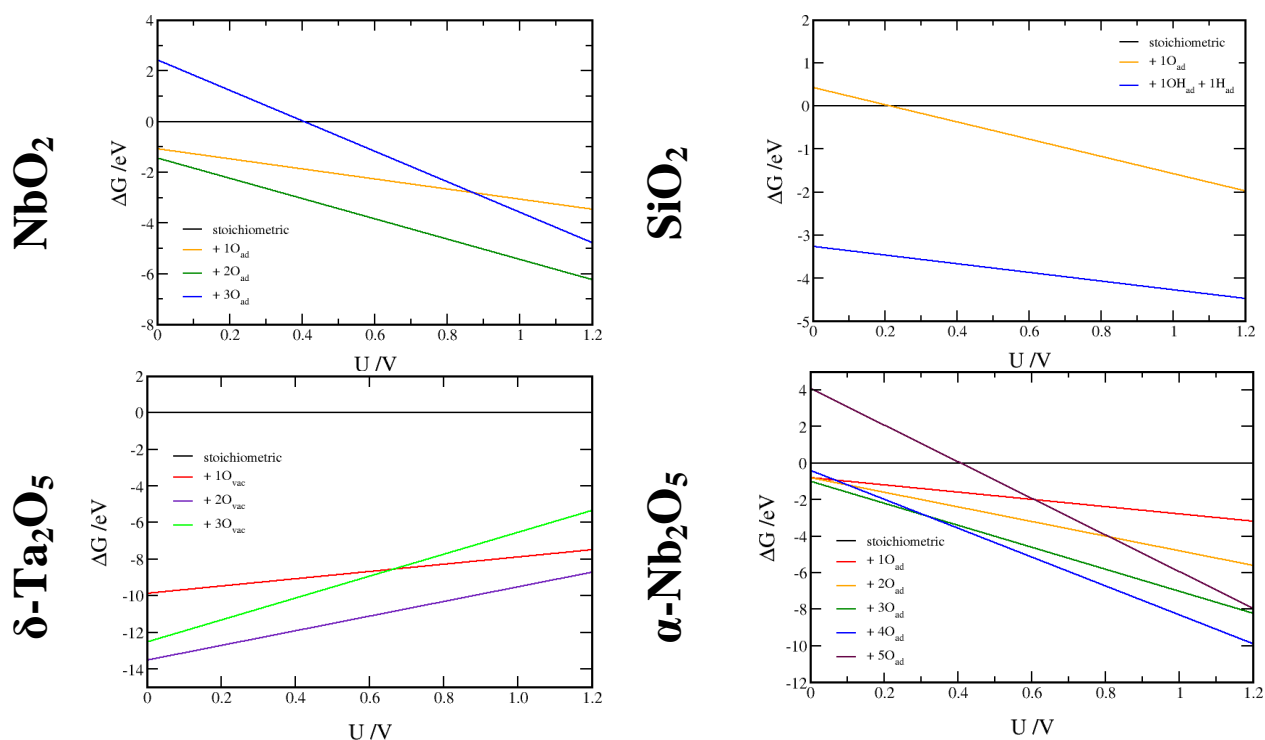

Figure 2: Stability plots for the most stable metal oxide surfaces. The equilibrium surfaces at  $U = 0.85 - 0.96$  V correspond to the lowest free energy lines in this range.

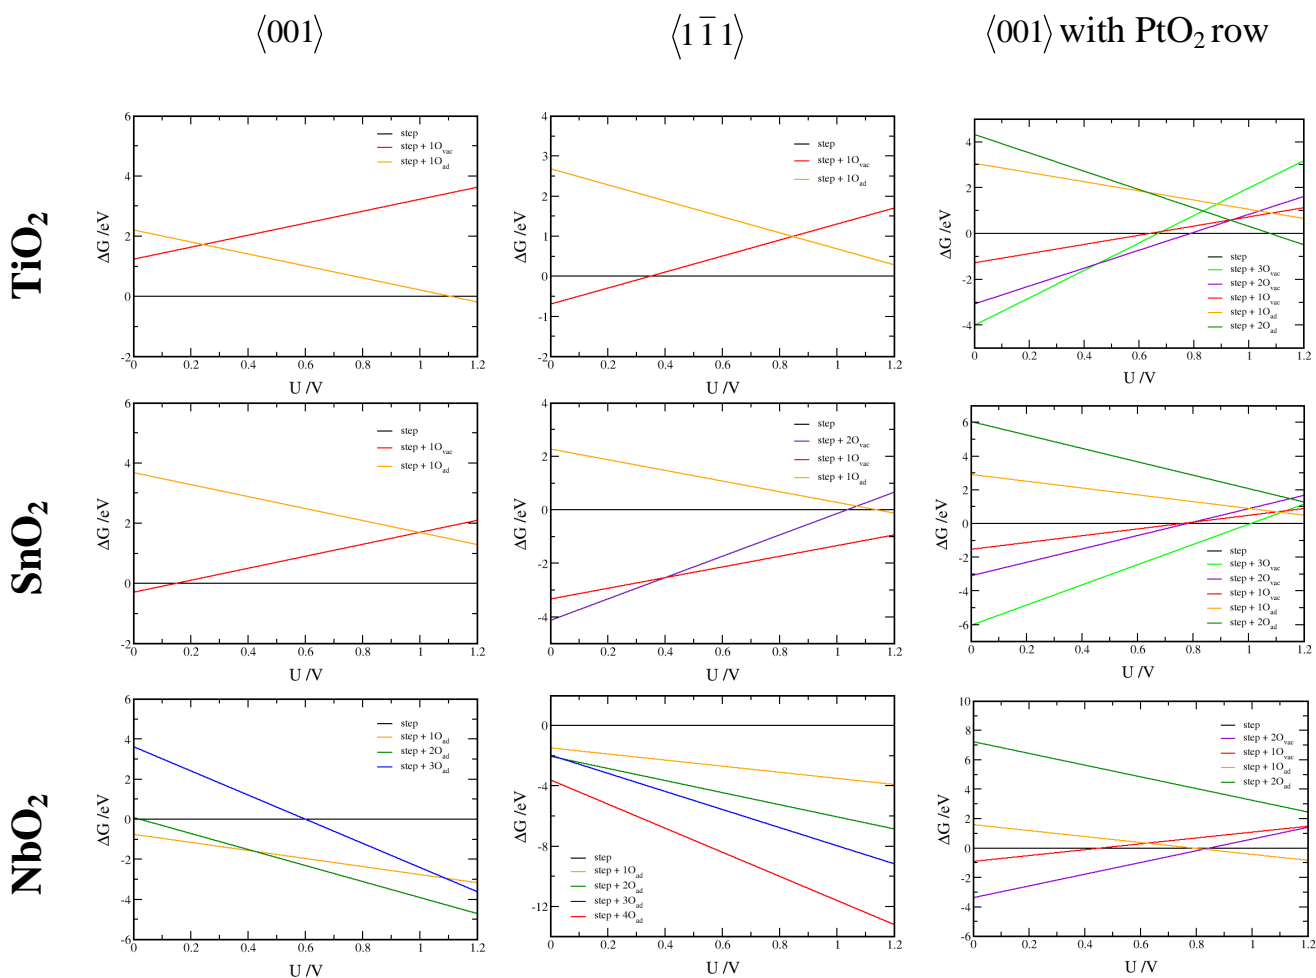

Figure 3: Stability plots for the rutile step surfaces,  $\langle 001 \rangle$  and  $\langle 1\bar{1}1 \rangle$  with and without an additional  $\text{PtO}_2$  row.

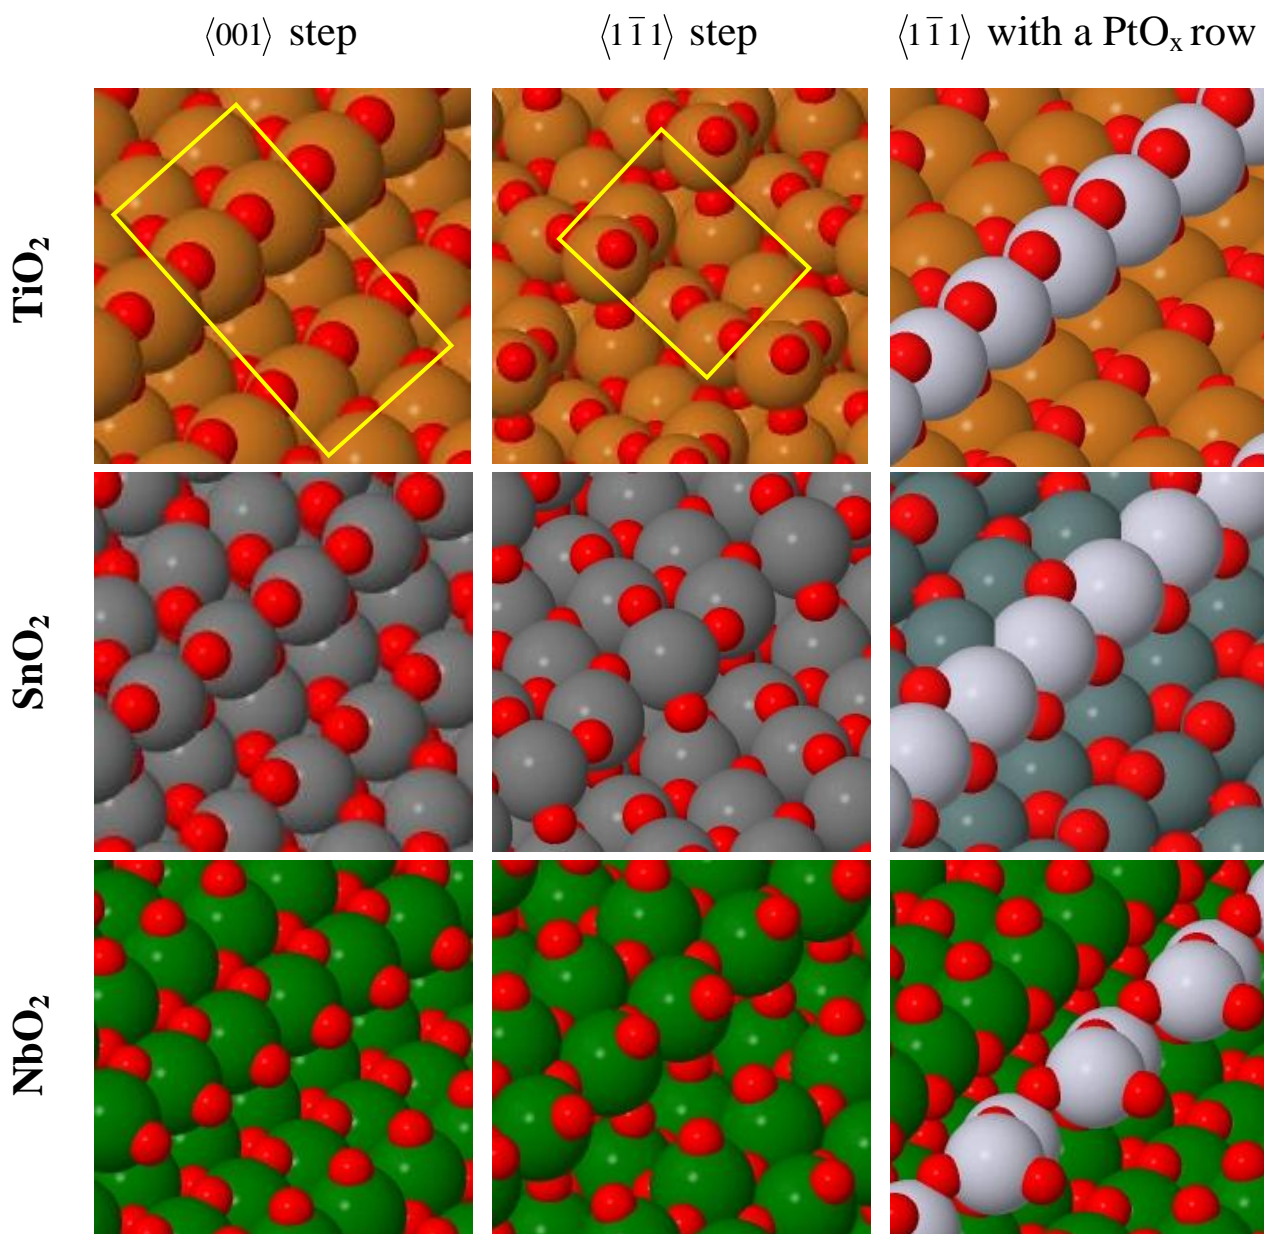

Figure 4: The most stable rutile step surfaces at  $U = 0.85 - 0.96$  V. The first two columns show the snapshots of  $\langle 001 \rangle$  and  $\langle 1\bar{1}1 \rangle$  steps, while the third column shows the illustrations of the  $\langle 001 \rangle$  surfaces with an additional  $\text{PtO}_x$  row. The boxes denote the unit cells sizes with the smallest periodicity.

## Stability plots for the most stable metal oxide surfaces in which one unit oxide unit is substituted with $\text{Pt}_j\text{O}_k$ .

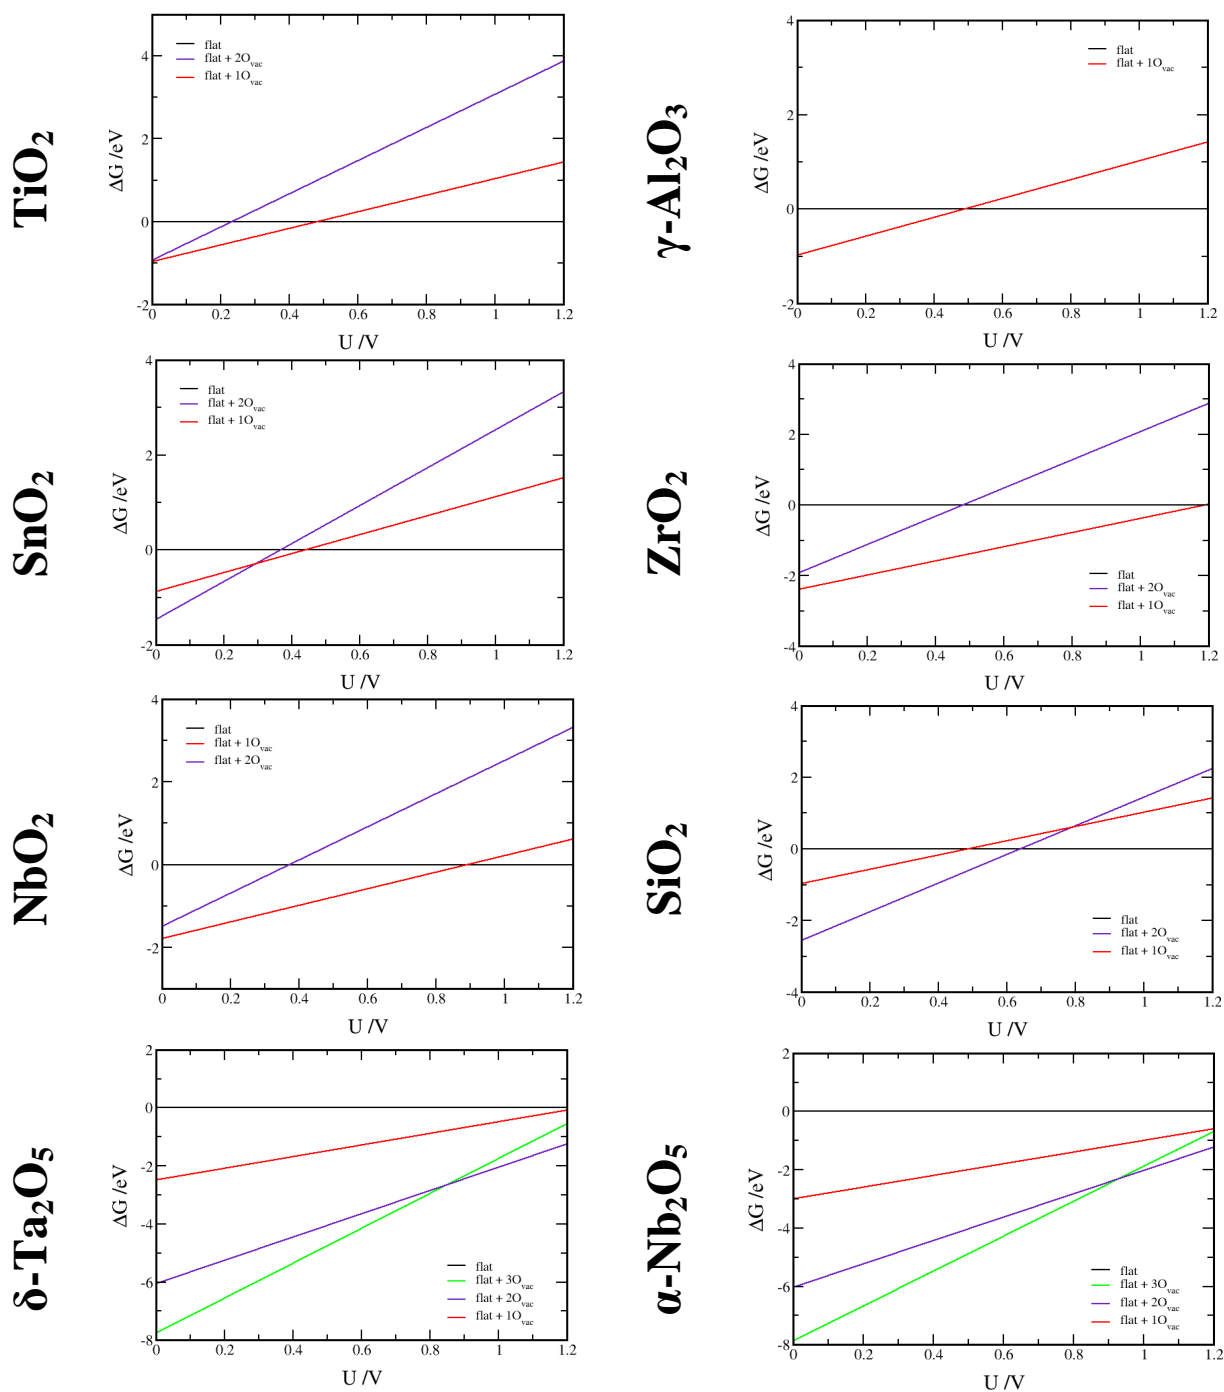

Figure 5: Stability plots for  $\text{PtO}_2$  adsorbed in the first layer of the metal oxide 110 surfaces.

- 
- 1 C. J. Howard; T. M. Sabine; F. Dickson, *Acta. Cryst.* **47** (1991) 462.
  - 2 N. R. Keskar, J. R. Chelikowsky, *Condensed Matter* **46** (1992) 1.
  - 3 A. A. Bolzan, C. Fong, B. J. Kennedy, C. J. Howard, *Acta Crystallogr., Sect. B: Struct. Sci.* **B53** (1997) 373.
  - 4 X. Krokidis, P. Raybaud, A.-E. Gobichon, B. Rebours, P. Euzen, H. Toulhoat, *J. Phys. Chem. B* **105** (2001) 5121.
  - 5 N. Terao, *Jpn. J. Appl. Phys.* **6** (1967) 21.
  - 6 B. M. Gatehouse, A. D. Wadsley, *Acta Cryst.* **17** (1964) 1545.
  - 7 C. J. Howard, E. H. Kisi, R. B. Roberts, R. J. Hill, *J. Am. Ceram. Soc.* **73** (1990) 2828.
  - 8 J. K. Nørskov, J. Rossmeisl, A. Logadottir, L. Lindqvist, J. R. Kitchin, T. Bligaard, H. Jónsson, *J. Phys. Chem. B* **108** (2004) 17886.
